# Supplementary material for: Shikonin and Luteolin Production in Hairy Root Culture of Perilla frutescens (L.)
Source: Research Square preprint supplement (doi:10.21203/rs.3.rs-7080593/v1), 2025-08-06
Supplement: Supplementary file 1 [file bf2a6e1c323d3556d0f28690.docx]

All data is included in the text of the manuscript. There is no supplementary file.
